# Supplementary material for: Tropospheric warming over the North Indian Ocean caused by the South Asian anthropogenic aerosols: possible implications
Source: Copernicus journal article supplement (doi:10.5194/acp-2021-969), 2021-12-01
Supplement: Supplementary file [file acp-2021-969-AC1-supplement.pdf]

### Total heating rates (LW+SW)

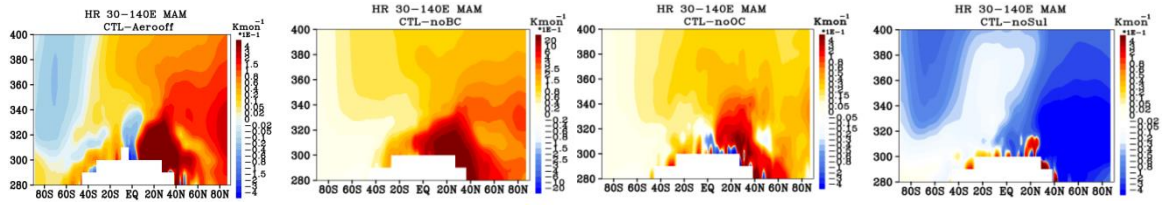

### Short wave heating rates

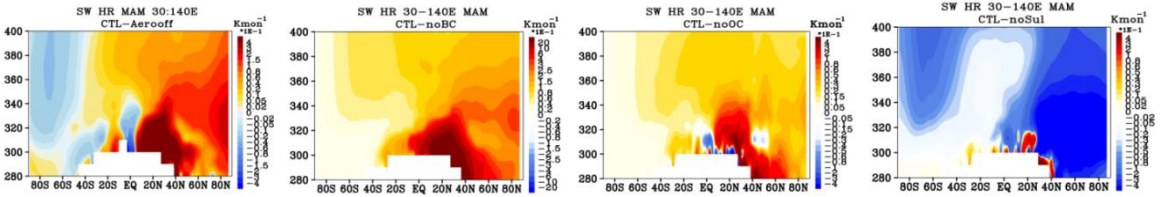

### Long wave heating rates

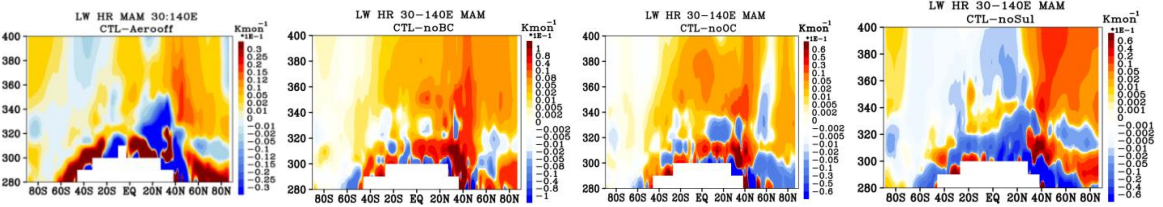

Figure: Zonal section (averaged 30° E – 140° E and for spring) of net heating rate (LW+SW), (Kmonth<sup>-1</sup>) from simulations (a) CTL-Aerooff, (b) CTL-noBC, (c) CTL-noOC, (d) CTL-nosul, (e-h) same as (a-d) but for SW heating rates, (i-l) same as (a-d) but for LW heating rates.
